# Supplementary material for: Porphyrin based metal–organic framework films: nucleation and growth
Source: Royal Society of Chemistry journal article supplement (doi:10.1039/d0ta06052f), 2020-01-01
Supplement: d0ta06052f1.pdf [file d0ta06052f1.pdf]

## **Porphyrin based metal-organic framework films: nucleation and growth**

Zhenyu Zhou,<sup>a</sup> Soumya Mukherjee,<sup>a</sup> Julien Warnan,<sup>a</sup> Weijin Li,<sup>\*a</sup> Suttipong Wannapaiboon,<sup>b</sup> Shujin Hou,<sup>c</sup> Katia Rodewald,<sup>d</sup> Bernhard Rieger,<sup>d</sup> Peter G. Weidler,<sup>e</sup> Christof Wöll,<sup>e</sup> Roland A. Fischer<sup>\*a</sup>

*<sup>a</sup>Chair of Inorganic and Metal-organic Chemistry, Catalysis Research Center, Ernst-Otto-Fischer Straße 1 and Department of Chemistry, Technical University of Munich, Lichtenbergstraße 4, 85748 Garching b. München, Germany*

*<sup>b</sup>Synchrotron Light Research Institute (Public Organization), Nakhon Ratchasima 30000, Thailand*

*<sup>c</sup>Physics of Energy Conversion and Storage, Department of Physics, James-Franck-Straße 1 and Catalysis Research Center, Otto-Fischer Straße 1, 85748, Garching b. München, Germany*

*<sup>d</sup>Wacker-Chair of Macromolecular Chemistry, Catalysis Research Center, Ernst-Otto-Fischer Straße 1 and Department of Chemistry, Technical University of Munich, Lichtenbergstraße 4, 85747 Garching b. München, Germany*

*<sup>e</sup>Institut für Funktionelle Grenzflächen, IFG, Karlsruher Institut für Technologie (KIT), 76021 Karlsruhe, Germany*

*\*Corresponding author: R. A. Fischer ([roland.fischer@tum.de](mailto:roland.fischer@tum.de)) and W.J. Li ([wj.li@tum.de](mailto:wj.li@tum.de))*

# Contents

|                                                                                                                                                                                                                         |        |
|-------------------------------------------------------------------------------------------------------------------------------------------------------------------------------------------------------------------------|--------|
| <b>1. Characterisation</b>                                                                                                                                                                                              | S4     |
| <b>2. Chemicals and materials</b>                                                                                                                                                                                       | S4     |
| <b>3. Ligand synthesis</b>                                                                                                                                                                                              | S5     |
| <b>4. Synthesis of <math>\text{Zr}_6\text{O}_4(\text{OH})_4(\text{OMe})_{12}</math></b>                                                                                                                                 | S5     |
| <b>5. Synthesis of PP-MOFs films</b>                                                                                                                                                                                    | S5-S8  |
| <b>6. Supporting Figures</b>                                                                                                                                                                                            | S9-S23 |
| <b>Fig. S1</b> Structures of the building units                                                                                                                                                                         | S9     |
| <b>Fig. S2</b> GIXRD patterns of $\text{Zn}_2(\text{ZnTCPP})$ films grown by VAC method on different substrates                                                                                                         | S9     |
| <b>Fig. S3</b> In-plane PXRD patterns of $\text{Zn}_2(\text{ZnTCPP})$ films fabricated by VAC, solvothermal, modular assembly and LPE methods                                                                           | S10    |
| <b>Fig. S4</b> ATR-IR spectra of TCPP ligand and $\text{Zn}_2(\text{ZnTCPP})$ films fabricated on $-\text{COOH}$ terminated gold substrates by different methods                                                        | S10    |
| <b>Fig. S5</b> UV-Vis spectra of TCPP ligand and $\text{Zn}_2(\text{ZnTCPP})$ films fabricated on $-\text{COOH}$ terminated gold substrates by different methods                                                        | S11    |
| <b>Fig. S6</b> GIXRD patterns of $\text{Zn}_2(\text{ZnTCPP})$ film grown by VAC method on $-\text{COOH}$ terminated gold substrate without acetic acid as modulator                                                     | S11    |
| <b>Fig. S7</b> SEM images of $\text{Zn}_2(\text{ZnTCPP})$ film grown by VAC method on $-\text{COOH}$ terminated gold substrate without acetic acid as modulator                                                         | S11    |
| <b>Fig. S8</b> GIXRD patterns of $\text{Zn}_2(\text{ZnTCPP})$ film grown by VAC method on $-\text{COOH}$ terminated gold substrate without acetic acid and DMF                                                          | S12    |
| <b>Fig. S9</b> SEM images of $\text{Zn}_2(\text{ZnTCPP})$ film grown by VAC method on $-\text{COOH}$ terminated gold substrate without acetic acid and DMF                                                              | S12    |
| <b>Fig. S10</b> Cross-section SEM images of $\text{Zn}_2(\text{ZnTCPP})$ films grown by VAC method on $-\text{COOH}$ terminated gold substrate with (a) 30 $\mu\text{L}$ and (b) 60 $\mu\text{L}$ of precursor solution | S12    |
| <b>Fig. S11</b> Roughness profiles of $\text{Zn}_2(\text{ZnTCPP})$ films fabricated on $-\text{COOH}$ terminated gold substrates by (a) VAC, (b) solvothermal, (c) modular assembly and (d) LPE methods                 | S13    |
| <b>Fig. S12</b> Different connectivities of $\text{Zr}_6$ clusters in the structures of Zirconium-based porphyrinic MOFs                                                                                                | S13    |
| <b>Fig. S13</b> GIXRD patterns of PCN-222 films grown by VAC technique on different functionalised substrates                                                                                                           | S14    |
| <b>Fig. S14</b> (a) Side-view scheme ( $ab$ plane) of PCN-222 film grown upon functionalised substrate along $a$ axis ( $[100]$ direction); (b) the $bc$ plane of PCN-222 film nucleated on the substrate surface       | S14    |
| <b>Fig. S15</b> GIXRD patterns of PCN-222 films grown on $-\text{COOH}$ terminated gold substrates by VAC method with different modulator to metal ratios                                                               | S15    |
| <b>Fig. S16</b> SEM images of PCN-222 film grown on $-\text{COOH}$ terminated gold substrate by VAC method with $r_M$ at 437                                                                                            | S15    |
| <b>Fig. S17</b> GIXRD patterns of PCN-222 films grown by VAC method on $-\text{COOH}$ terminated gold substrate with low and high precursor concentrations                                                              | S15    |
| <b>Fig. S18</b> GIXRD patterns of PCN-222 films grown on $-\text{COOH}$ terminated gold substrates by VAC method using different reaction time                                                                          | S16    |
| <b>Fig. S19</b> GIXRD patterns of PCN-222 films grown on $-\text{COOH}$ terminated gold substrates by VAC method on different reaction temperatures                                                                     | S16    |
| <b>Fig. S20</b> ATR-IR spectra of CuTCPP ligand and PCN-222 films fabricated on $-\text{COOH}$ terminated gold substrates by different methods                                                                          | S17    |
| <b>Fig. S21</b> Cross-section SEM images of PCN-222 films grown by VAC method on $-\text{COOH}$ terminated gold substrate                                                                                               | S17    |
| <b>Fig. S22</b> SEM images of PCN-222 film grown on silicon (a-b) and ITO (c-d) by VAC                                                                                                                                  |        |

|                                                                                                                                                                                                                                          |         |
|------------------------------------------------------------------------------------------------------------------------------------------------------------------------------------------------------------------------------------------|---------|
| method.....                                                                                                                                                                                                                              | S18     |
| <b>Fig. S23</b> Roughness profiles of PCN-222 films fabricated on –COOH terminated gold substrates by (a) VAC, (b) solvothermal, (c) modular assembly and (d) LPE methods...                                                             | S18     |
| <b>Fig. S24</b> GIXRD patterns of PCN-224 films grown by VAC method on different functionalised substrates.....                                                                                                                          | S18     |
| <b>Fig. S25</b> (a) Side-view scheme ( <i>ab</i> plane) of PCN-224 film grown upon functionalised substrate along <i>a</i> axis ([200] direction); (b) the <i>bc</i> plane of PCN-224 film which nucleated on the substrate surface..... | S19     |
| <b>Fig. S26</b> GIXRD patterns of PCN-224 films grown on –COOH terminated gold substrates via VAC method with different modulator to metal ratios ( $r_M$ ) .....                                                                        | S19     |
| <b>Fig. S27</b> GIXRD patterns of PCN-224 films grown on –COOH terminated gold substrates via VAC method using different reaction time ...                                                                                               | S20     |
| <b>Fig. S28</b> GIXRD patterns of PCN-224 films grown on –COOH terminated gold substrates via VAC method on different reaction temperatures .....                                                                                        | S20     |
| <b>Fig. S29</b> SEM images of PCN-224 film grown on –COOH terminated gold substrate via VAC method.....                                                                                                                                  | S20     |
| <b>Fig. S30</b> Roughness profiles of (a) PCN-224 and (b) MOF-525 films fabricated on –COOH terminated gold substrates by VAC method .....                                                                                               | S21     |
| <b>Fig. S31</b> GIXRD patterns of MOF-525 films grown by VAC method on different functionalised substrates .....                                                                                                                         | S21     |
| <b>Fig. S32</b> (a) Side-view scheme of the MOF-525 film randomly grown upon functionalised substrate; (b) the <i>ab</i> plane and (c) <i>bc</i> plane of MOF-525 .....                                                                  | S21     |
| <b>Fig. S33</b> GIXRD patterns of MOF-525 films grown on –COOH terminated gold substrates via VAC method with different modulator to metal ratios ( $r_M$ ).....                                                                         | S22     |
| <b>Fig. S34</b> GIXRD patterns of MOF-525 films grown on –COOH terminated gold substrates via VAC method using different reaction times.....                                                                                             | S22     |
| <b>Fig. S35</b> SEM images of MOF-525 film grown on –COOH terminated gold substrate via VAC method .....                                                                                                                                 | S23     |
| <b>Fig. S36</b> Methanol sorption isotherms at ambient temperature (25 °C) of PCN-224 film fabricated by VAC method on the –COOH terminated Au-coated QCM substrate..                                                                    | S23     |
| <b>Fig. S37</b> Methanol sorption isotherms at ambient temperature (25 °C) of MOF-525 film fabricated by VAC method on the –COOH terminated Au-coated QCM substrate..                                                                    | S23     |
| <b>7. Supporting Tables</b> .....                                                                                                                                                                                                        | S24-S30 |
| <b>Table S1</b> List of atomic coordinates for the simulated structure of $Zn_2(ZnTCPP)$ films .....                                                                                                                                     | S24     |
| <b>Table S2</b> Recipes for the fabrication of $Zn_2(ZnTCPP)$ films by VAC .....                                                                                                                                                         | S26     |
| <b>Table S3</b> Surface roughness of $Zn_2(ZnTCPP)$ films fabricated via different methods .....                                                                                                                                         | S27     |
| <b>Table S4</b> Recipes for the fabrication of PCN-222 films by VAC.....                                                                                                                                                                 | S27-S28 |
| <b>Table S5</b> Surface roughness of PCN-222 films fabricated via different methods.....                                                                                                                                                 | S28     |
| <b>Table S6</b> Recipes for the fabrication of PCN-224 films by VAC .....                                                                                                                                                                | S29     |
| <b>Table S7</b> Recipes for the fabrication of MOF-525 films by VAC .....                                                                                                                                                                | S29     |
| <b>Table S8</b> Surface roughness of PCN-224 and MOF-525 films fabricated by VAC .....                                                                                                                                                   | S30     |
| <b>8. Reference</b> .....                                                                                                                                                                                                                | S31     |

## 1. Characterisations

**X-ray diffraction measurement:** The crystalline phase and crystal orientation of the obtained MOF thin films were identified by powder X-ray diffraction (PXRD, X' Pert Pan Analytical instrument, Bragg-Brentano geometry, Cu K $\alpha$  radiation, 2 $\theta$  range 2-25°, scan step size of 0.01°) and grazing incidence XRD (GIXRD, PANalytical Empyrean instrument, grazing incidence mode, room temperature, Cu-K $\alpha$  radiation, a range of 2 $\theta$  range 5-25° for Zn<sub>2</sub>(ZnTCPP) and 2-15° for 3D PP-MOF, a step of 0.01313°, an accumulation time of 1.5 s per step); meanwhile, the in-plane XRD patterns of Zn<sub>2</sub>(ZnTCPP) thin films were measured with a Bruker D8 Discover with Cu K $\alpha_{1,2}$  radiation with an in-plane geometry, over a 2 $\theta$  range ~ 5 to 23° using a scan-time of 2 seconds per 0.025°.

**Scanning electron microscopy (SEM) analysis:** Top and cross-sectional view images were taken by using an environmental scanning electron microscope (ESEM, FEI ESEM Dual Beam™ Quanta 3D FEG) in order to investigate the surface morphology and surface coverage of the MOF films.

**Infrared spectroscopy and ultraviolet-visible spectroscopy analysis:** Attenuated total reflectance infrared (ATR-IR) spectra of samples were performed using a PerkinElmer instrument with an ATR sampling accessory. Ultraviolet-visible spectroscopy (UV-Vis) were carried out on a UV-visible spectrophotometer (PerkinElmer Lambda 650 S UV/VIS spectrometer) with a slit of 2.0 nm, data interval 1.0 nm, the scan speed of 600.00 nm/min, and a scan range of 800.00 nm to 350.00 nm. For the measurements of digested MOF films, a small piece of the MOF thin film was dissolved in 1.0 M NaOH aqueous solution. The obtained solution was then added into a quartz cell (1.0 cm) for UV-visible measurement.

**Surface profiles analysis:** Surface profiles of the films were characterised using a profilometer (DektakXT, BRUKER, Germany) with a diamond stylus in order to investigate their surface roughness.

**Methanol vapor sorption:** was carried out at a controlled temperature of 25 °C on an environmental-controlled quartz crystal microbalance (BELQCM-4 instrument, BEL Japan). Prior to sorption measurements, the PP-MOFs films were activated by soaking them in pure CH<sub>2</sub>Cl<sub>2</sub> for 24 hours at room temperature and subsequently dried in a pure N<sub>2</sub> stream. Additionally, the samples were placed into the BEL-QCM instrument cells and in situ heated at 50 °C under a He stream (99.999%, 100 sccm) for two hours. After the activation process, the QCM frequency was recorded when the frequency change was stable within  $\pm 5$  Hz over 30 min. Afterwards, methanol sorption isotherms were collected by varying the relative vapor pressure ( $P/P_0$ ) of the saturated vapor of probe molecules in a He gas stream at 25 °C ranging from 0.0 to 95.0 %. The mass of the PP-MOFs films and adsorption amounts were calculated from the difference of the read QCM frequency and the fundamental frequency of the bare QCM substrate according to Sauerbrey's equation.

## 2. Chemicals and materials

All reagents and solvents were purchased from commercial sources and used without further purification unless otherwise stated: zinc nitrate hexahydrate (Zn(NO<sub>3</sub>)<sub>2</sub>·8H<sub>2</sub>O,  $\geq 99\%$ ), zinc acetate dihydrate (Zn(OAc)<sub>2</sub>·2H<sub>2</sub>O, 98%), copper(II) chloride dihydrate (CuCl<sub>2</sub>·2H<sub>2</sub>O, 99%) were purchased from ACROS; zirconium(IV) oxychloride octahydrate (ZrOCl<sub>2</sub>·8H<sub>2</sub>O,  $\geq 99.5\%$ ), methacrylic acid (99%), acetic acid (reagent grade,  $\geq 99.5\%$ ), methanol (anhydrous, 99.8%), Methyl 4-formylbenzoate ( $\geq 96.0\%$ ) were purchased from Sigma Aldrich; meso-tetra(4-

carboxyphenyl)porphine ( $H_2TCPP$ , TCI); N,N-dimethylformamide (DMF; spectrophotometric grade, VWR); ethanol(absolute, Th. Geyer); zirconium(IV) n-propoxide (70% w/v in n-propanol, Alfa Aesar); gold substrate (Angstrom Engineering); silicon substrate (Siegert Wafer); ITO glass(Adrafruit).

### 3. Ligand synthesis

The tetrakis(4-carboxyphenyl)porphyrin ( $H_2TCPP$ ) ligand was purchased from TCI. Copper-involved TCPP (Cu-TCPP) ligand was synthesized based on previous reports.<sup>1</sup> Typically, we obtained it by three steps as follows:

#### 1) 5,10,15,20-Tetrakis(4-methoxycarbonylphenyl)porphyrin (TPPCOOMe).

To refluxed propionic acid (100 mL) in a 500-mL three necked flask were added pyrrole (3.0, 0.043 mol) and methyl p-formylbenzoate (6.9 g, 0.042 mol), and the solution was refluxed for 12h in darkness. After the reaction mixture was cooled to room temperature, crystals were collected by suction-filtration to afford purple crystals (1.4g).  $^1H$  NMR (300 MHz,  $CDCl_3$ ):  $\delta$  8.81 (s, 8H), 8.43 (d, 8H), 8.28 (d, 8H), 4.11 (s, 12H), -2.83 (s, 2H).

#### 2) [5,10,15,20-Tetrakis(4-methoxycarbonylphenyl)porphyrinato]-Cu(II) (CuTPPCOOMe).

A solution of TPPCOOMe 0.854 g (1.0 mmol) and  $CuCl_2 \cdot 2H_2O$  (2.2g, 12.8 mmol) in 100 mL of DMF was refluxed for 6 h. After the mixture was cooled to room temperature, 150 mL of  $H_2O$  was added. The resultant precipitate was filtered and washed with 50 mL of  $H_2O$  for two times. The obtained solid was dissolved in  $CHCl_3$ , followed by washing three times with water. The organic layer was dried over anhydrous magnesium sulfate and evaporated to afford quantitative dark red crystals.

#### 3) [5,10,15,20-Tetrakis(4-carboxyphenyl)porphyrinato]-Cu(II) (Cu-TCPP).

The obtained ester (0.75 g) was stirred in THF (25 mL) and MeOH (25 mL) mixed solvent, to which a solution of KOH (2.63 g, 46.95 mmol) in  $H_2O$  (25 mL) was introduced. This mixture was refluxed for 12 h. After cooling down to room temperature, THF and MeOH were evaporated. Additional water was added to the resulting water phase and the mixture was heated until the solid was fully dissolved, then the homogeneous solution was acidified with 1M HCl until no further precipitate was detected. The dark red was collected by filtration, washed with water and dried in vacuum.  $^1H$  NMR (300 MHz,  $DMSO-d_6$ ):  $\delta$  8.80 (s, 8H), 8.37 (d, 8H), 8.28 (d, 8H).

### 4. Synthesis of $Zr_6O_4(OH)_4(OMc)_{12}$

$Zr_6O_4(OH)_4(OMc)_{12}$  (Hexazirconium-tetraoxy-tetrahydroxy-dodecamethacrylate) is known as a precursor to the metal secondary building unit (SBU) of zirconium-based PP-MOFs. The compound was synthesized according to the adapted procedure from Kickelbick and Schubert. In a large Schlenk flask, 1 mL of 70% w/v  $Zr(OPr)_4$  (3.1 mmol) in n-propanol was mixed at room temperature with 1 mL of methacrylic acid (McOH; 11.8 mmol, 5.3 equiv) under inert gas atmosphere (Ar). After 2 weeks, the colorless crystals were collected by filtration and washing with small quantities of n-propanol. The product was dried in vacuum for 12 h and yielded the desired sample.

### 5. Preparation of PP-MOF films

#### 1) Substrate pretreatment.

Au substrates (1 cm x 1 cm), Au-coated QCM substrates (AT cut type, Au electrode, diameter

14 mm, thickness 0.3 mm, and fundamental frequency ca. 4.95 MHz) were cleaned by soaking them in the mixed solution of water/H<sub>2</sub>O<sub>2</sub>/ammonia with a ratio of 5/1/1 at 75 °C for 15 min. Afterwards, the substrates were functionalised by immersing them into a solution of 16-mercaptohexadecanoic acid (MHDA, 20 µM) in ethanol with acetic acid (5% v/v) or in a solution of 1-mercaptoundecanol (MUD, 20 µM) in ethanol for at least 24 h at room temperature in order to obtain the –COOH or –OH terminated surface via self-assembled monolayers formation (SAM) and subsequently rinsed with pure ethanol and dried with N<sub>2</sub> before the use.

The silicon-wafers (1 cm x 1 cm), ITO glass substrates (1 cm x 1 cm) were cleaned in ethanol for about 10 min in an ultrasonic bath, and then activated under UV light for 60 min in order to in order to clean and generate a surface with hydroxyl groups. The substrates were used immediately for the growth of PP-MOFs films after UV light treatment.

## 2) Synthesis of 2D PP-MOF films.

Zn<sub>2</sub>(ZnTCPP) film growth via VAC. For the film growth using VAC, a 20 mL glass vial with a cap equipped was used. A Raschig-ring was placed on the bottom of the vial to offer an elevated flat platform for the substrate. Zn(NO<sub>3</sub>)<sub>2</sub>·6H<sub>2</sub>O (4.5 mg, 0.015 mmol), TCPP (4 mg, 0.005 mmol), acetic acid (10 µL, 1M in DMF solution) and pyrazine (0.8 mg, 0.01 mmol) were dissolved in a mixed solution DMF (1.5 mL) and ethanol (0.5 mL) as the precursor solution. A mixture of 1mL DMF/ethanol (v/v, 3/1) and 5 µL acetic acid was filled into the vial as vapour source. Afterwards, the pre-treated Au/Silicon/ITO substrates (1 cm x 1 cm) was placed on top of the Raschig-ring and fully coated with 40 µL freshly prepared MOF precursor solution. The vial was closed and was transferred into a preheated 80 °C oven where it was kept for the specified time (details in table S1). Afterwards the vial was removed from the oven and allowed to cool down for 10 min before the Zn<sub>2</sub>(ZnTCPP) film was removed. The film was immersed in fresh DMF and ethanol several times and then dried under vacuum.

The Zn<sub>2</sub>(ZnTCPP) film grew without acetic acid in precursor solution and vapour source also conducted in same procedure only without acetic acid in precursor solution and vapour source.

Zn<sub>2</sub>(ZnTCPP) film growth via solvothermal method. Zn(NO<sub>3</sub>)<sub>2</sub>·6H<sub>2</sub>O (4.5 mg, 0.015 mmol), TCPP (4 mg, 0.005 mmol), acetic acid (10 µL, 1M in DMF solution) and pyrazine (0.8 mg, 0.01 mmol) were dissolved in a mixed solution DMF (1.5 mL) and ethanol (0.5 mL) at room temperature and then the mixture were sonicated for 10 min. The –COOH functionalised Au substrate was then placed into the vial (with the activated side facing down to the bottom). Then, the reaction precursors were heated to 80 °C and kept for one day. After cooling down to room temperature, the obtained Zn<sub>2</sub>(ZnTCPP) thin film was removed from the reaction mixture, rinsed with fresh DMF and ethanol, and dried at 50 °C under vacuum.

Zn<sub>2</sub>(ZnTCPP) film preparation via Modular Assembly. Firstly, Zn(NO<sub>3</sub>)<sub>2</sub>·6H<sub>2</sub>O (4.5 mg, 0.015 mmol), TCPP (4 mg, 0.005 mmol), acetic acid (10 µL, 1M in DMF solution) and pyrazine (0.8 mg, 0.01 mmol) were dissolved in a mixed solution DMF (1.5 mL) and ethanol (0.5 mL) at room temperature. The reaction mixtures were sonicated for 10 min and then heated to 80 °C and kept for one day. After slowly cooled to room temperature, the synthesized red powder was washed with ethanol and collected by centrifuging.

Secondly, the as-synthesized Zn<sub>2</sub>(ZnTCPP) nanosheets were dispersed in ethanol by ultrasonication to get a colloidal suspension (1.0 mg/cm<sup>3</sup>); The suspension was placed dropwise onto the surface of water in a beaker, and due to the hydrophobic property of the Zn<sub>2</sub>(ZnTCPP), they spread out to form a thin film; The thin film was easily transferred to a –COOH functionalised Au substrate

by stamping. The film was immersed in pure water to remove un-deposited  $\text{Zn}_2(\text{ZnTCPP})$  nanosheets and the water on the substrate was blown away. Additional nanosheets could be repeatedly stacked in a layer-by-layer (LBL) growth fashion to create a  $\text{Zn}_2(\text{ZnTCPP})$  thin film with the desired thickness.

$\text{Zn}_2(\text{ZnTCPP})$  film growth via LPE on pump system. Synthesis of  $\text{Zn}_2(\text{ZnTCPP})$  thin films was conducted on a double-walled reaction vessel, which was heated with a silicon-oil thermostat. The solutions were pumped in and out by peristaltic pumps which were controlled by LAB view (National Instruments) on computer. For the growth of  $\text{Zn}_2(\text{ZnTCPP})$ , the  $-\text{COOH}$  functionalised Au substrate was placed in the reaction vessel (with the activated side facing down to the bottom) and alternatively treated with a 0.3 mM  $\text{Zn}(\text{OAc})_2$  in DMF/ethanol (v/v, 3/1) and 0.1 mM  $\text{H}_2\text{TCPP}$  in DMF/ethanol (v/v, 3/1) solution. The substrate was immersed into each solution for 10 min. In between these reactive steps, the substrate was rinsed with pure ethanol for 2 min. These deposition cycles were repeated 30 times (30 cycles) at 70 °C to fabricate the oriented crystalline  $\text{Zn}_2(\text{ZnTCPP})$  thin films.

### 3) 3D PP-MOF films preparation.

#### a) PCN-222 films growth.

**PCN-222 film growth via VAC.** For the film growth using VAC, a 20 mL glass vial with a cap equipped was used. A Raschig-ring was placed on the bottom of the vial to offer an elevated flat platform for the substrate. A mixture of 1 mL DMF and 0.2 mL acetic acid was filled into the vial as vapour source. Afterwards, the pre-treated Au/Silicon/ITO substrates (1 cm x 1 cm) was placed on top of the Raschig-rings and fully coated with a drop of a freshly prepared MOF precursor solution. The vial was closed and was transferred into a preheated 100 °C oven where it was kept for the specified time (details in table S2). Afterwards the vial was removed from the oven and allowed to cool down for 10 min before the PCN-222 film was removed. The film was immersed in fresh DMF and ethanol several times and then dried under vacuum.

**PCN-222 film growth via solvothermal method.**  $\text{ZrOCl}_2 \cdot 8\text{H}_2\text{O}$  (1.9 mg, 0.006 mmol), CuTCPP (1.7 mg, 0.002 mmol), acetic acid (75  $\mu\text{L}$ ) were dissolved in 1 mL DMF at room temperature and then the mixture was sonicated for 10 min. The  $-\text{COOH}$  functionalised Au substrate was then placed into the vial (with the activated side facing down to the bottom). Then, the reaction precursors were heated to 100 °C and kept for one day. After cooling down to room temperature, the obtained PCN-222 film was removed from the reaction mixture, rinsed with fresh DMF and ethanol, and dried under vacuum.

**PCN-222 film preparation via Modular Assembly.** Firstly, the PCN-222 nanoparticles were synthesized using a solvothermal reaction.  $\text{ZrOCl}_2 \cdot 8\text{H}_2\text{O}$  (5.7 mg, 0.006 mmol), CuTCPP (5.1 mg, 0.006 mmol), acetic acid (225  $\mu\text{L}$ ) were dissolved in 3 mL DMF at room temperature and then the mixture were sonicated for 10 min. Then, the reaction precursors were heated to 100 °C and kept for one day. After slowly cooled to room temperature, the synthesized red powder was washed with fresh DMF and ethanol and collected by centrifuging.

Secondly, the as-synthesized PCN-222 nanoparticles were dispersed in ethanol by ultrasonication to get a colloidal suspension (1.0 mg/cm<sup>3</sup>); The suspension was placed dropwise onto the surface of water in a beaker, and due to the hydrophobic property of PCN-222, they spread out to form a thin film; The thin film was easily transferred to a  $-\text{COOH}$  functionalised Au substrate by stamping. The film was immersed in pure water to remove un-deposited PCN-222 and the water on the substrate was blown away. Additional cycles could be repeatedly stacked in a layer-by-layer

(LBL) growth fashion to create a PCN-222 film with the desired thickness.

**PCN-222 film growth via LPE on pump system.** The synthesis of PCN-222 film was conducted on a double-walled reaction vessel, which was heated with a silicon-oil thermostat. The solutions were pumped in and out by peristaltic pumps which were controlled by LAB view (National Instruments) on computer. For the growth of PCN-222, 30  $\mu\text{M}$   $\text{Zr}_6\text{O}_4(\text{OH})_4(\text{OMc})_{12}$  solution (mixed with acetic acid, 50 and 100 eq.) and 60  $\mu\text{M}$  CuTCPP linker solution were prepared in DMF. The  $-\text{COOH}$  functionalised Au substrate was placed in the reaction vessel (with the activated side facing down to the bottom) and alternatively treated with a  $\text{Zr}_6\text{O}_4(\text{OH})_4(\text{OMc})_{12}$  solution for 10 min and then CuTCPP linker solution for 10 min. The substrate was immersed into each solution for 10 min. Each subsequent step of dosing components was separated by a washing step of 2 min with absolute ethanol. These deposition cycles were repeated 30 times (30 cycles) at 100  $^{\circ}\text{C}$  to fabricate the PCN-222 films.

**b) PCN-224 films growth.**

**PCN-224 film growth via VAC.** For the film growth using VAC, a 20 mL glass vial with a cap equipped was used. A Raschig-ring was placed on the bottom of the bottle to offer an elevated flat platform for the substrate. A mixture of 1 mL DMF and 0.2 mL acetic acid was filled into the bottle as vapour source. Afterwards, the pre-treated Au/Silicon substrates (1 cm x 1 cm) was placed on top of the Raschig-ring and fully coated with a drop of a freshly prepared MOF precursor solution. The bottle was closed and was transferred into a preheated 70  $^{\circ}\text{C}$  oven where it was kept for the specified time (details in table S3). Afterwards the bottle was removed from the oven and allowed to cool down for 10 min before the PCN-224 film was removed. The film was immersed in fresh DMF and ethanol several times and then dried under vacuum.

**c) MOF-525 films growth**

**MOF-525 film growth via VAC.** For the film growth using VAC, a 20 mL glass vial with a cap equipped was used. A Raschig-ring was placed on the bottom of the bottle to offer an elevated flat platform for the substrate. A mixture of 1mL DMF and 0.2 mL acetic acid was filled into the bottle as vapour source. Afterwards, the pre-treated Au/Silicon/ITO substrates (1 cm x 1 cm) was placed on top of the Raschig-ring and fully coated with a drop of a freshly prepared MOF precursor solution. The bottle was closed and was transferred into a preheated 80  $^{\circ}\text{C}$  oven where it was kept for the specified time (details in table S4). Afterwards the bottle was removed from the oven and allowed to cool down for 10 min before the MOF-525 film was removed. The film was immersed in fresh DMF and ethanol several times and then dried under vacuum.



## 6. Supporting Figures

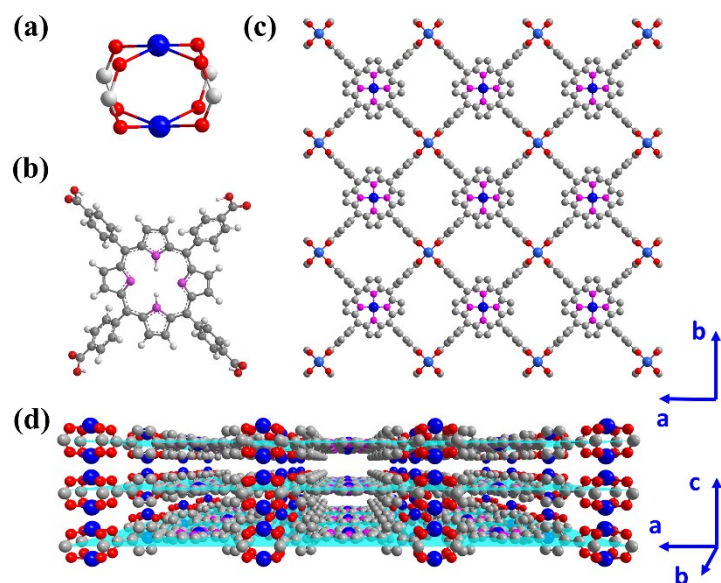

**Fig. S1** Structures of the building units a)  $\text{Zn}_2(\text{COO})_4$  paddlewheel metal node, b) TCPP ligand for 2D  $\text{Zn}_2(\text{ZnTCPP})$  nanosheets; 2D “checkerboard” structure of  $\text{Zn}_2(\text{ZnTCPP})$  nanosheets c) view along [001] direction of one layer of  $\text{Zn}_2(\text{ZnTCPP})$ ; d) the layered structure of 2D  $\text{Zn}_2(\text{ZnTCPP})$  nanosheets stacked in an AA packing pattern, planes were inserted in each layer. H atoms have been omitted for clarity. Colour scheme: C, grey; O, red; N, pink and Zn, blue.

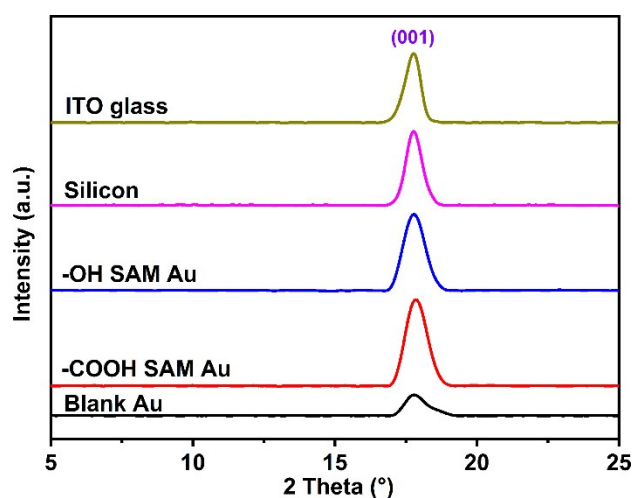

**Fig. S2** GIXRD patterns of  $\text{Zn}_2(\text{ZnTCPP})$  films grown by VAC method on different substrates: blank gold,  $-\text{COOH}$  SAM gold,  $-\text{OH}$  SAM gold, silicon and ITO glass.

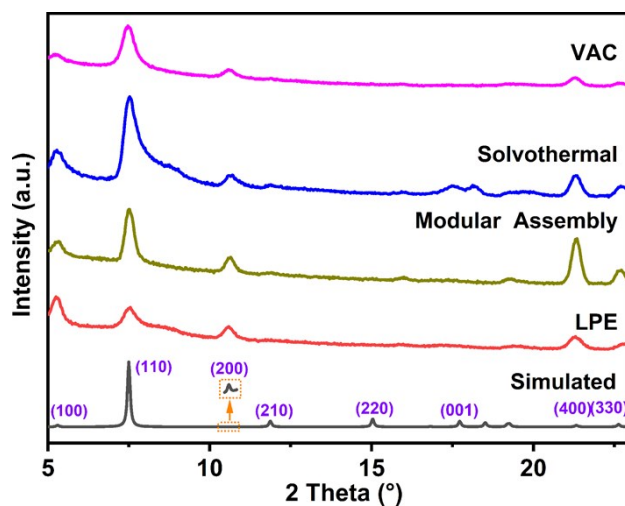

**Fig. S3** In-plane PXRD patterns of  $\text{Zn}_2(\text{ZnTCPP})$  films fabricated by VAC, solvothermal, modular assembly and LPE methods. The insert was the magnified (200) peak.

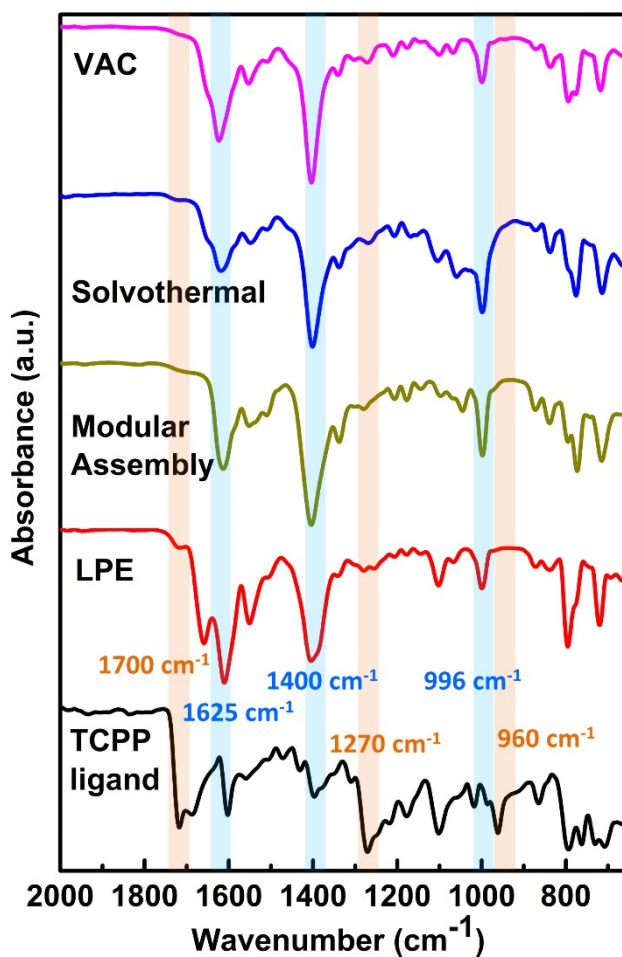

**Fig. S4** ATR-IR spectra of TCPP ligand and  $\text{Zn}_2(\text{ZnTCPP})$  films fabricated on  $-\text{COOH}$  terminated gold substrates by different methods.

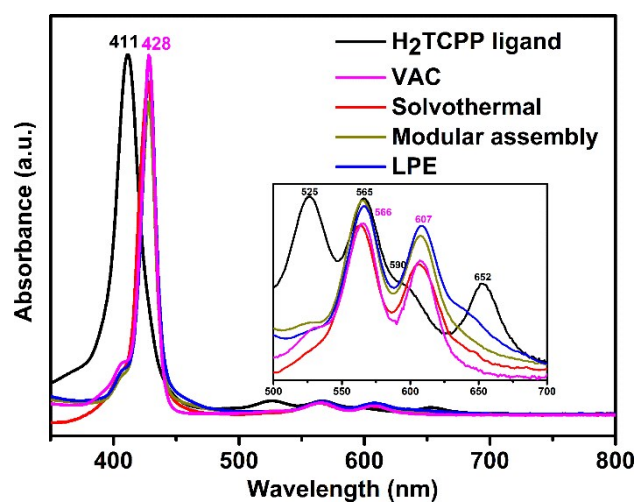

**Fig. S5** UV-Vis spectra of TCPP ligand and  $\text{Zn}_2(\text{ZnTCPP})$  films fabricated on  $-\text{COOH}$  terminated gold substrates by different methods: VAC, solvothermal, modular assembly and LPE. Note that enlarged Q-band region is inserted.

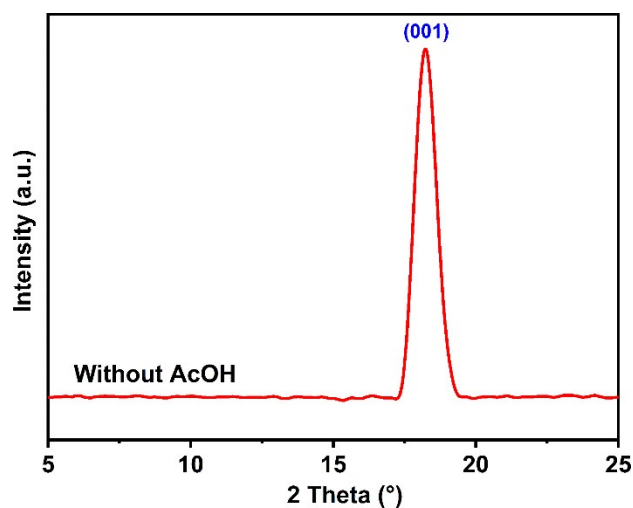

**Fig. S6** GIXRD patterns of  $\text{Zn}_2(\text{ZnTCPP})$  film grown by VAC method on  $-\text{COOH}$  terminated gold substrate without acetic acid as modulator.

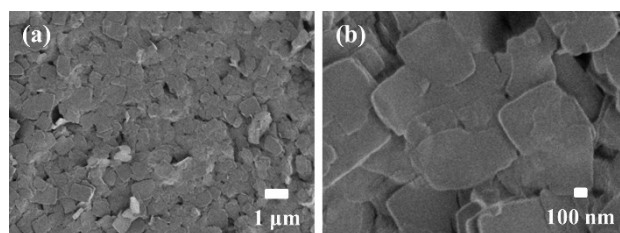

**Fig. S7** SEM images of  $\text{Zn}_2(\text{ZnTCPP})$  film grown by VAC method on  $-\text{COOH}$  terminated gold substrate without acetic acid as modulator.

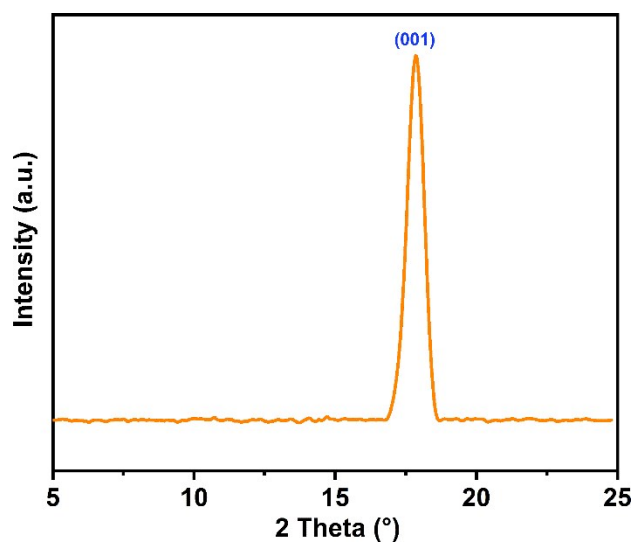

**Fig. S8** GIXRD patterns of  $\text{Zn}_2(\text{ZnTCPP})$  film grown by VAC method on  $-\text{COOH}$  terminated gold substrate without acetic acid and DMF.

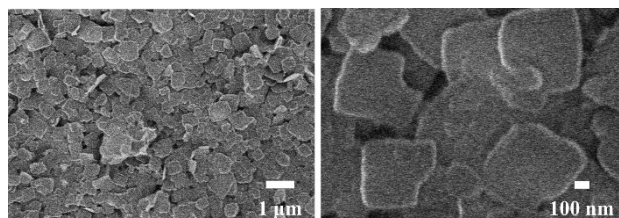

**Fig. S9** SEM images of  $\text{Zn}_2(\text{ZnTCPP})$  film grown by VAC method on  $-\text{COOH}$  terminated gold substrate without acetic acid and DMF.

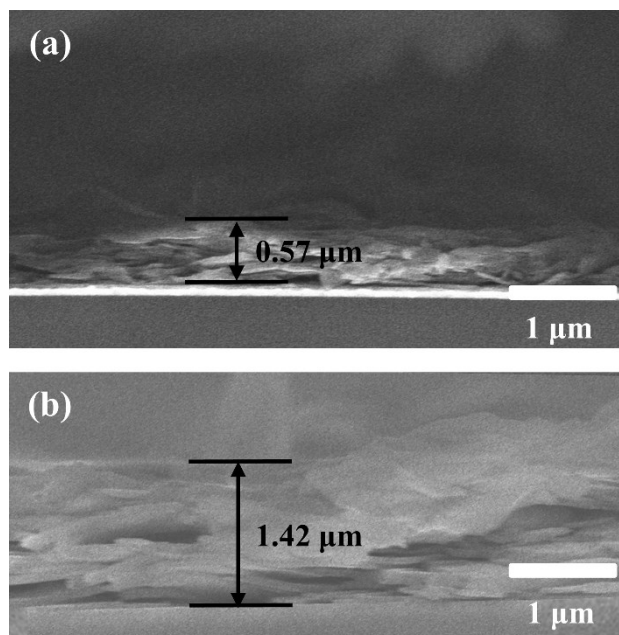

**Fig. S10** Cross-section SEM images of  $\text{Zn}_2(\text{ZnTCPP})$  films grown by VAC method on  $-\text{COOH}$  terminated gold substrate with (a) 30 μL and (b) 60 μL of precursor solution

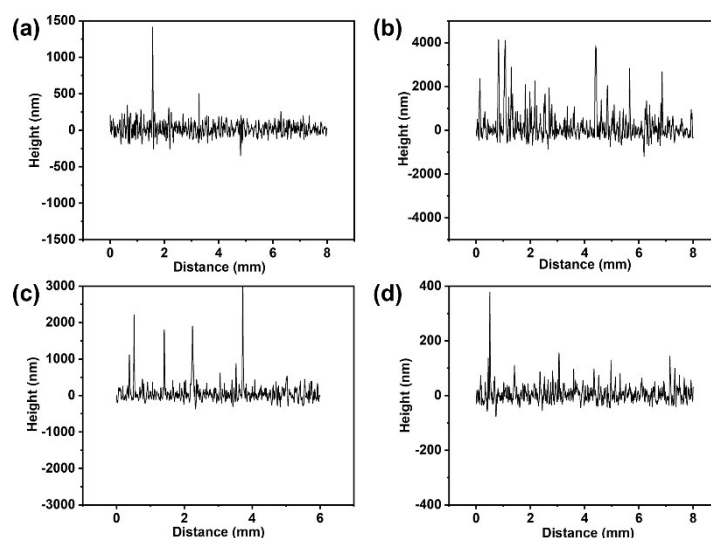

**Fig. S11** Roughness profiles of  $\text{Zn}_2(\text{ZnTCPP})$  films fabricated on  $-\text{COOH}$  terminated gold substrates by (a) VAC, (b) solvothermal, (c) modular assembly and (d) LPE methods.

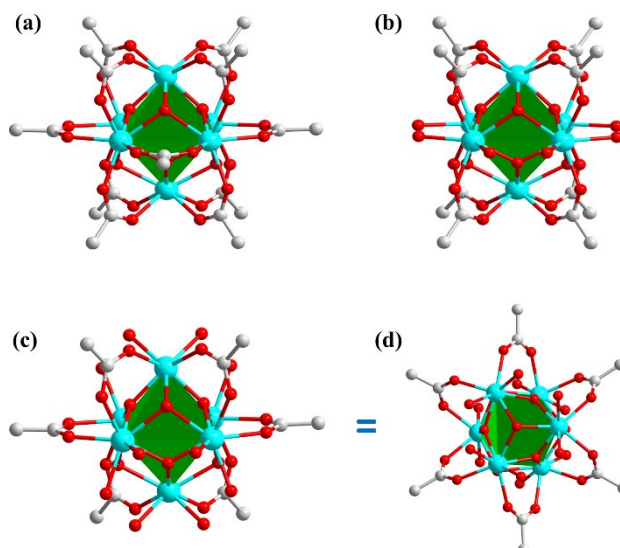

**Fig. S12** Different connectivities of  $\text{Zr}_6$  clusters in the structures of Zirconium-based porphyrinic MOFs: (a) 12-connected  $\text{Zr}_6$  cluster for MOF-525; (b) 8-connected  $\text{Zr}_6$  cluster for PCN-222; (c-d) 6-connected  $\text{Zr}_6$  cluster for PCN-224 ((c): side view; (d): top view). Colour scheme: C, grey; O, red, and Zr, aqua. The green polyhedron represent the octahedral geometry of the  $\text{Zr}_6$  cluster.

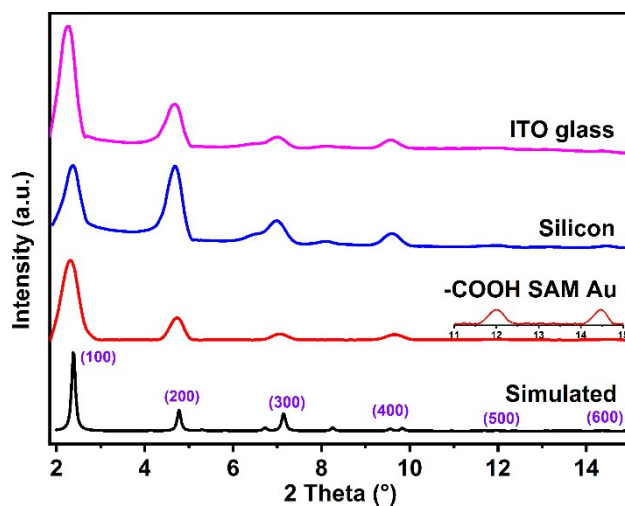

**Fig. S13** GIXRD patterns of PCN-222 films grown by VAC technique on different functionalised substrates: –COOH SAM gold, silicon, ITO glass. Note that VAC deposition was conducted using 30  $\mu$ L freshly prepared MOF precursor solution with the acetic acid as modulator ( $r_M = 219$ ) at 100  $^{\circ}$ C for 3 h.

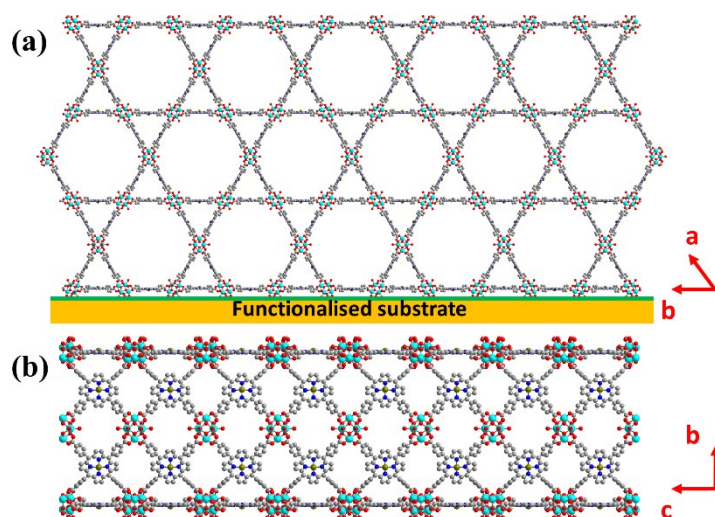

**Fig. S14** (a) Side-view scheme (the  $ab$  plane) of the PCN-222 film grown upon functionalised substrate along  $a$  axis ([100] direction), in which the channels are parallel to the plane of the substrate; (b) the  $bc$  plane of PCN-222 film which nucleated on the substrate surface.



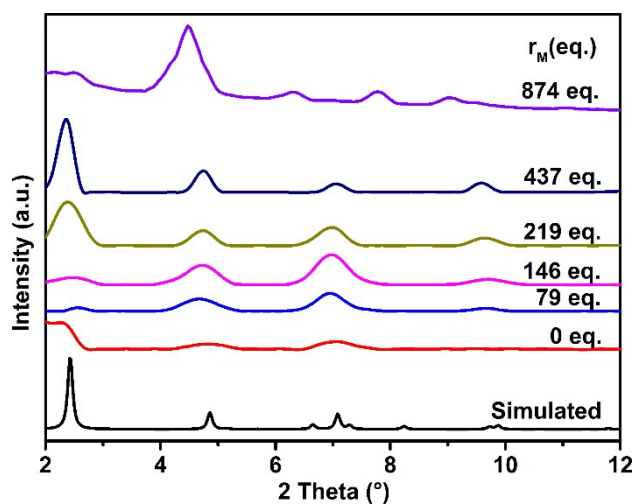

**Fig. S15** GIXRD patterns of PCN-222 films grown on –COOH terminated gold substrates by VAC method with different modulator to metal ratios ( $r_M$ ).

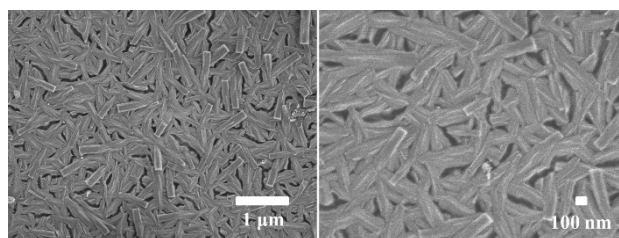

**Fig. S16** SEM images of PCN-222 film grown on –COOH terminated gold substrate by VAC method with  $r_M$  at 437

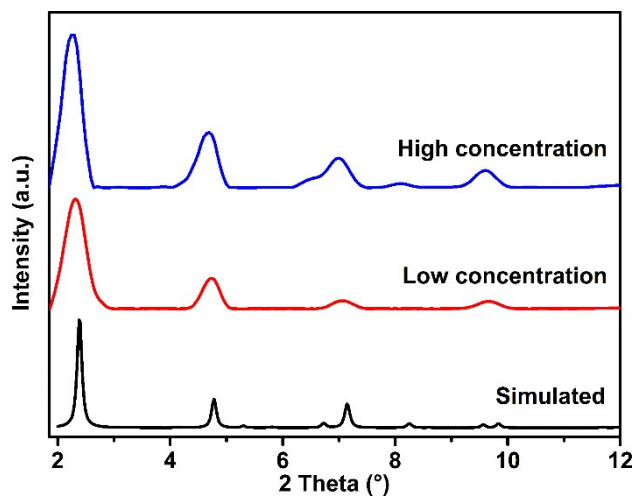

**Fig. S17** GIXRD patterns of PCN-222 films grown by VAC method on –COOH terminated gold substrate with low and high precursor concentrations.

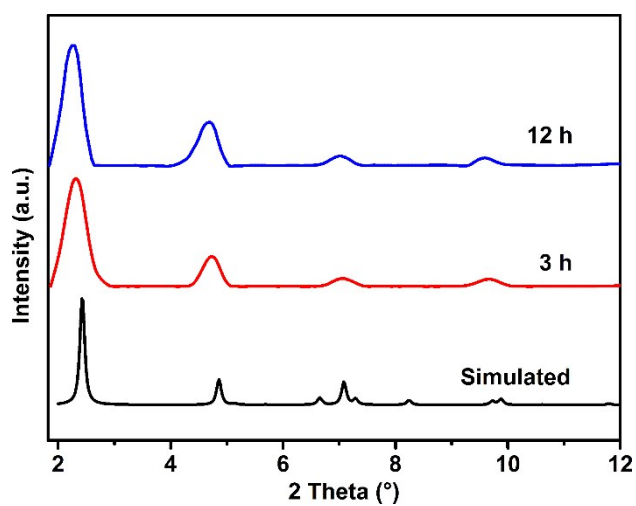

**Fig. S18** GIXRD patterns of PCN-222 films grown on  $\text{-COOH}$  terminated gold substrates by VAC method using different reaction time.

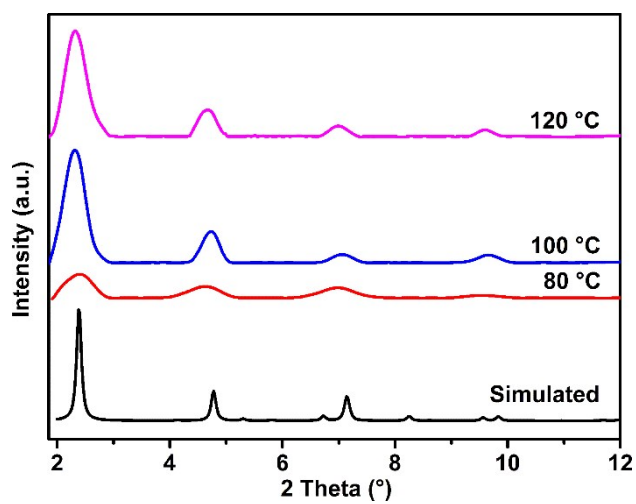

**Fig. S19** GIXRD patterns of PCN-222 films grown on  $\text{-COOH}$  terminated gold substrates by VAC method on different reaction temperatures.



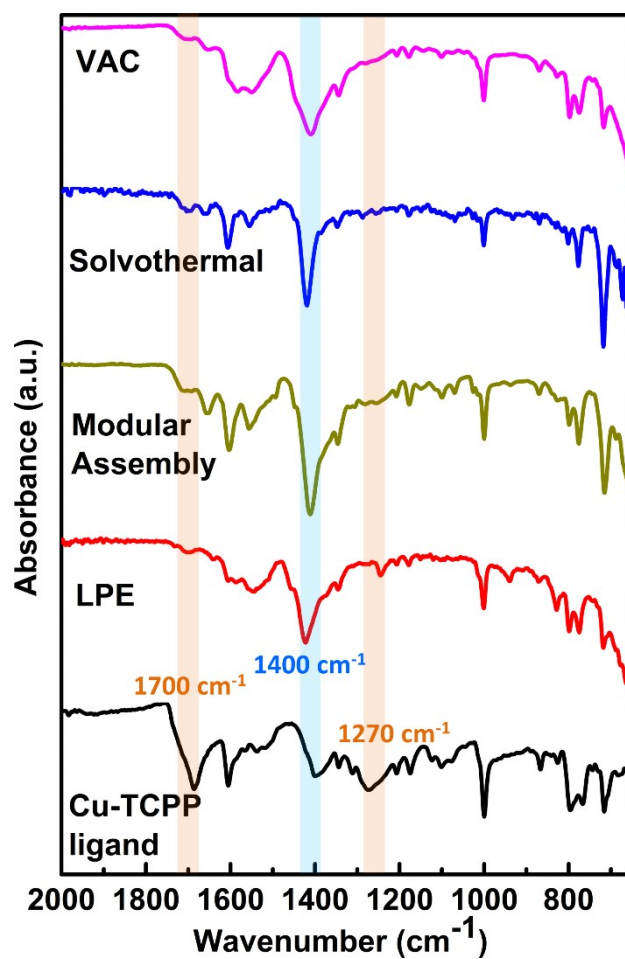

**Fig. S20** ATR-IR spectra of CuTCCP ligand and PCN-222 films fabricated on  $-\text{COOH}$  terminated gold substrates by VAC, solvothermal, modular assembly and LPE methods.

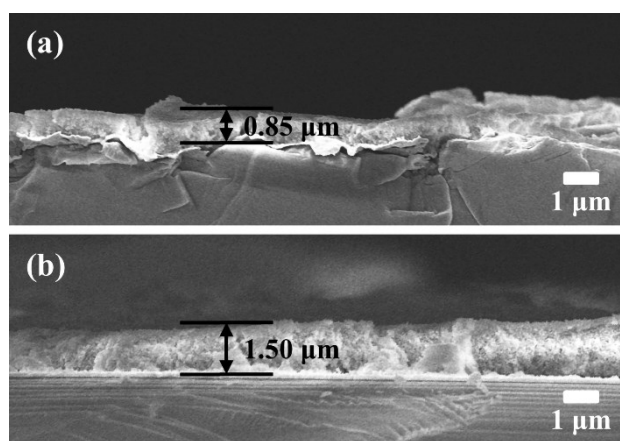

**Fig. S21** Cross-section SEM images of PCN-222 films grown by VAC method on  $-\text{COOH}$  terminated gold substrate with (a) 30  $\mu\text{L}$  and (b) 60  $\mu\text{L}$  of precursor solution.

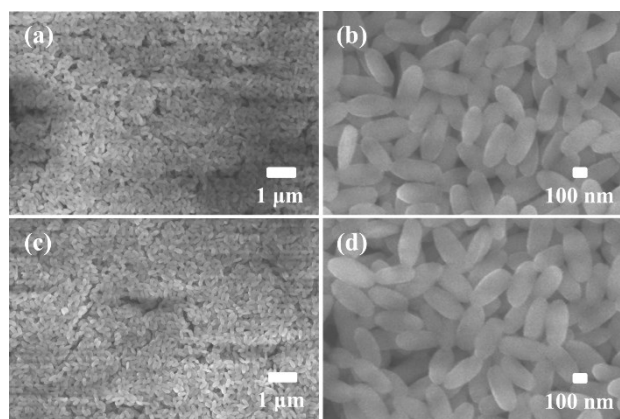

**Fig. S22** SEM images of PCN-222 film grown on silicon (a-b) and ITO (c-d) by VAC.

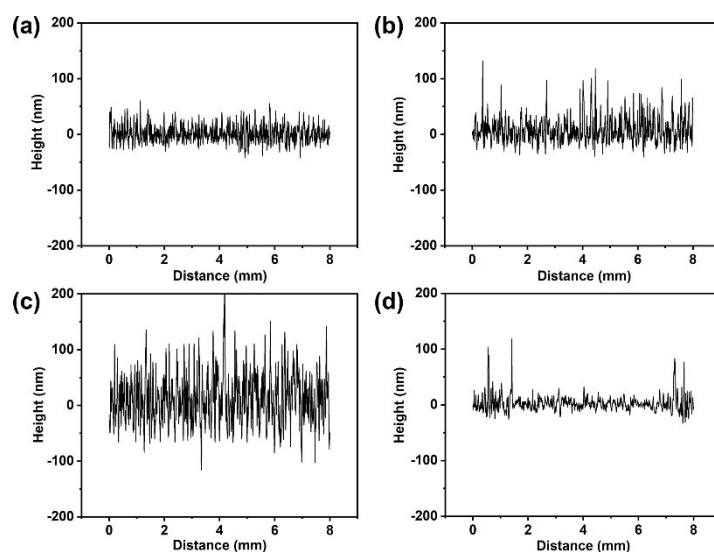

**Fig. S23** Roughness profiles of PCN-222 films fabricated on  $-\text{COOH}$  terminated gold substrates by (a) VAC, (b) solvothermal, (c) modular assembly and (d) LPE methods.

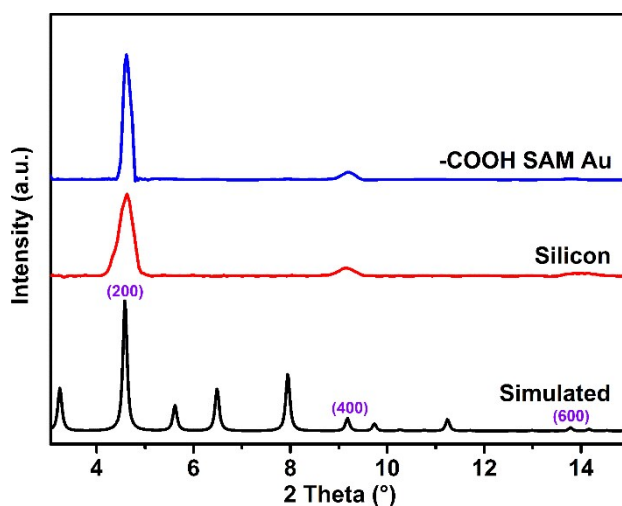

**Fig. S24** GIXRD patterns of PCN-224 films grown by VAC method on different functionalised substrates.

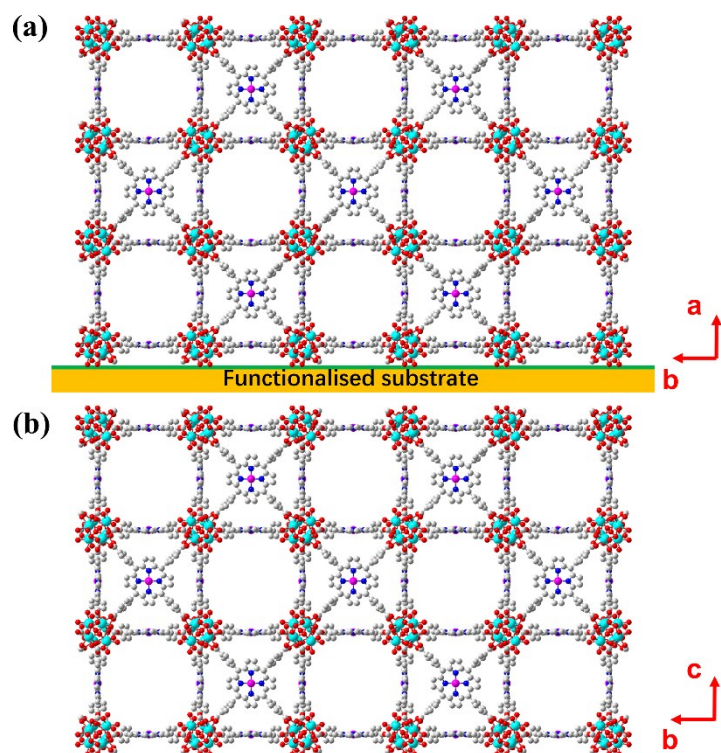

**Fig. S25** (a) Side-view scheme ( $ab$  plane) of PCN-224 film grown upon functionalised substrate along  $a$  axis ( $[200]$  direction); (b) the  $bc$  plane of PCN-224 film which nucleated on the substrate surface.

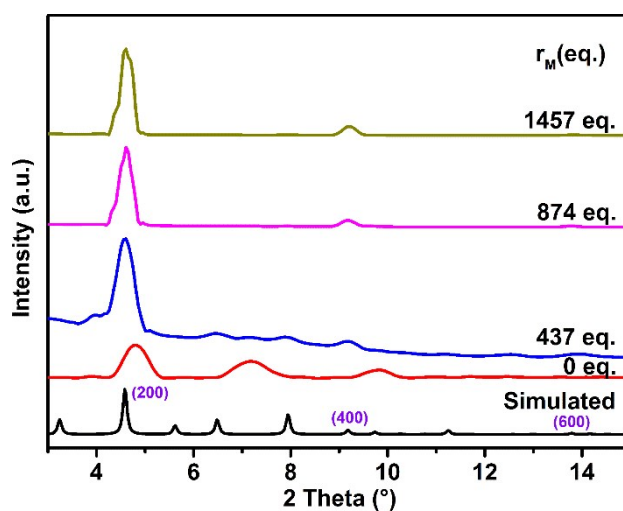

**Fig. S26** GIXRD patterns of PCN-224 films grown on  $-\text{COOH}$  terminated gold substrates via VAC method with different modulator to metal ratios ( $r_M$ ).

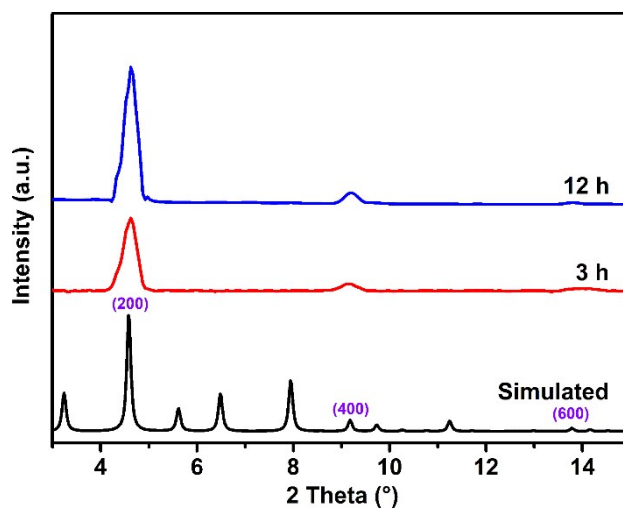

**Fig. S27** GIXRD patterns of PCN-224 films grown on –COOH terminated gold substrates via VAC method using different reaction time.

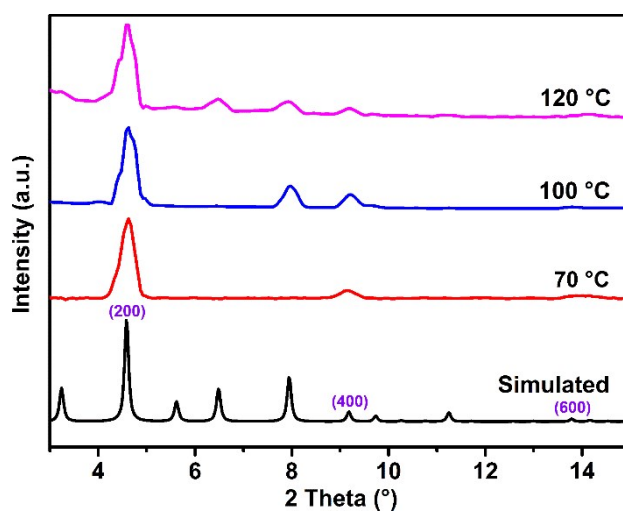

**Fig. S28** GIXRD patterns of PCN-224 films grown on –COOH terminated gold substrates via VAC method on different reaction temperatures.

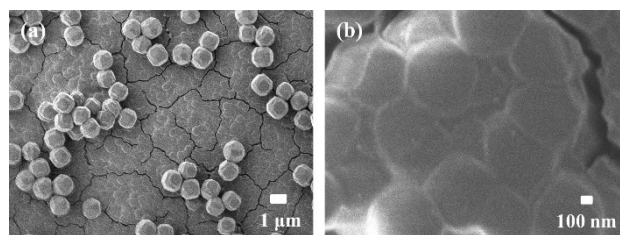

**Fig. S29** SEM images of PCN-224 film grown on –COOH terminated gold substrate via VAC method; note that in the VAC deposition method, 30  $\mu$ L freshly prepared MOF precursor solution is used with acetic acid as modulator ( $r_M = 1457$ ) at 70 °C for 3 h.

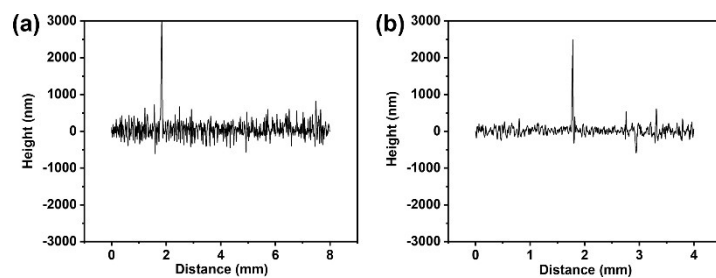

**Fig. S30** Roughness profiles of (a) PCN-224 and (b) MOF-525 films fabricated on  $-\text{COOH}$  terminated gold substrates by VAC method.

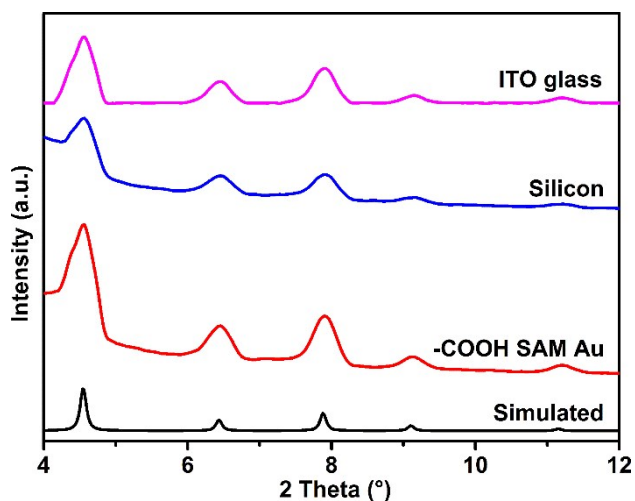

**Fig. S31** GIXRD patterns of MOF-525 films grown by VAC method on different functionalised substrates.

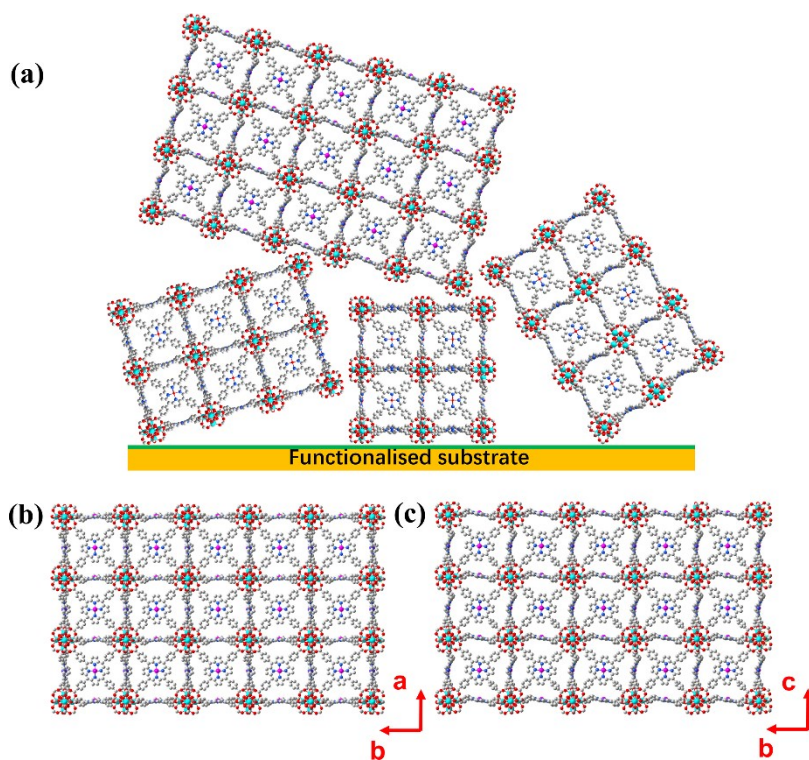

**Fig. S32** (a) Side-view scheme of the MOF-525 film randomly grown upon functionalised substrate; (b) the  $ab$  plane and (c)  $bc$  plane of MOF-525.



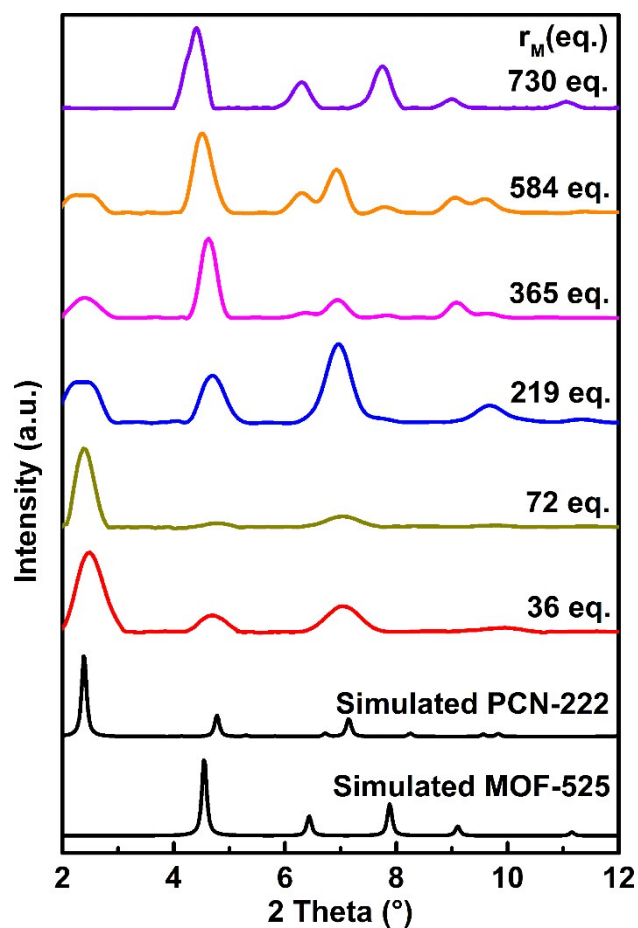

**Fig. S33** GIXRD patterns of MOF-525 films grown on  $-\text{COOH}$  terminated gold substrates via VAC method with different modulator to metal ratios ( $r_M$ )

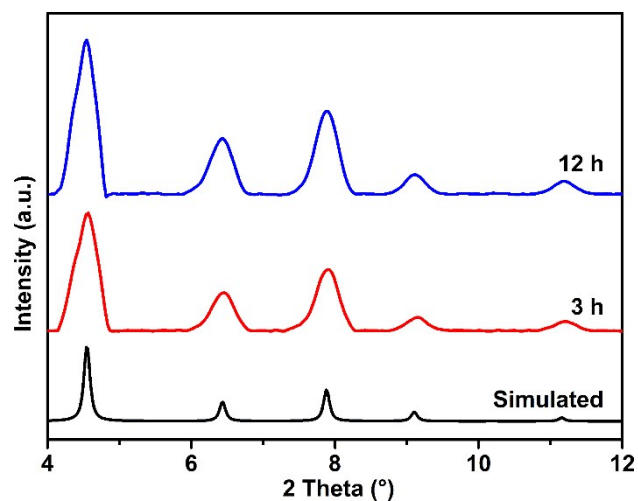

**Fig. S34** GIXRD patterns of MOF-525 films grown on  $-\text{COOH}$  terminated gold substrates via VAC method using different reaction times.

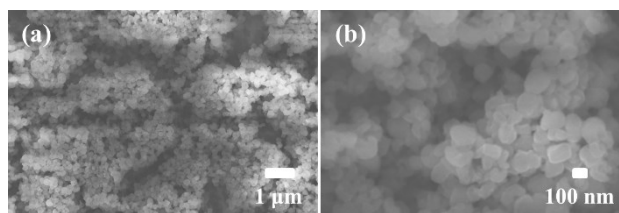

**Fig. S35** SEM images of MOF-525 film grown on  $-\text{COOH}$  terminated gold substrate via VAC method; note that during VAC deposition,  $30\ \mu\text{L}$  freshly prepared MOF precursor solution is used with acetic acid as modulator ( $r_{\text{M}} = 730$ ) at  $80\ ^\circ\text{C}$  for 3 h.

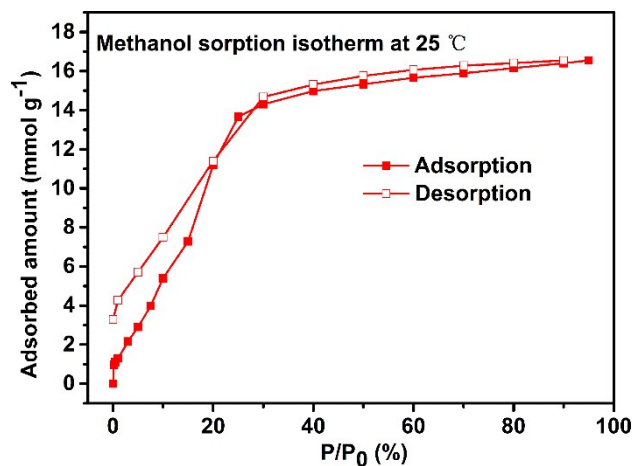

**Fig.S36** Methanol sorption isotherms at ambient temperature ( $25\ ^\circ\text{C}$ ) of PCN-224 film fabricated by VAC method on the  $-\text{COOH}$  terminated Au-coated QCM substrate.

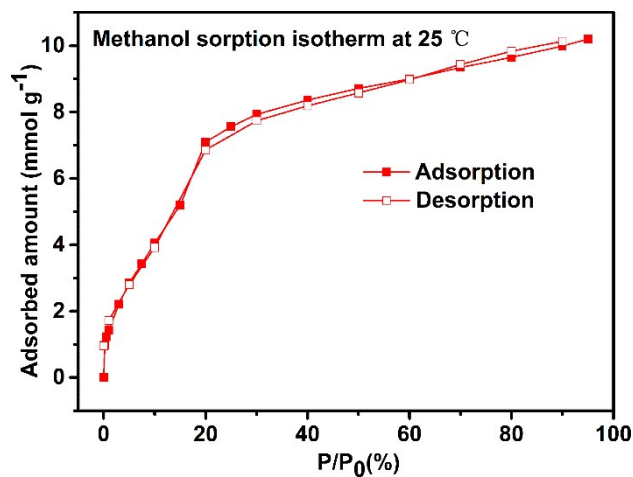

**Fig.S37** Methanol sorption isotherms at ambient temperature ( $25\ ^\circ\text{C}$ ) of MOF-525 film fabricated by VAC method on the  $-\text{COOH}$  terminated Au-coated QCM substrate.

## 7. Supporting Tables

**Table S1.** List of atomic coordinates for the simulated structure of Zn<sub>2</sub>(ZnTCPP) films.

| Atoms | x       | y        | z        | Atoms | x        | y        | z        |
|-------|---------|----------|----------|-------|----------|----------|----------|
| Zn1   | 0       | 0        | 0        | C7    | -0.0653  | 0.1694   | 0        |
| Zn2   | 0.5     | 0.5      | 0.2929   | C8    | -0.0404  | 0.2517   | 0        |
| O1    | 0.41519 | 0.41519  | 0.22326  | H8    | -0.0736  | 0.2965   | 0        |
| N1    | 0.1205  | 0        | 0        | N1    | 0        | -0.1205  | 0        |
| C1    | 0.39255 | 0.39255  | 0        | C7    | 0.0653   | -0.1694  | 0        |
| C2    | 0.3271  | 0.3271   | 0        | C8    | 0.0404   | -0.2517  | 0        |
| C3    | 0.29735 | 0.29735  | 0.2334   | H8    | 0.0736   | -0.2965  | 0        |
| H1    | 0.3169  | 0.3169   | 0.39482  | O1    | -0.41519 | -0.41519 | -0.22326 |
| C4    | 0.2387  | 0.2387   | 0.23537  | C1    | -0.39255 | -0.39255 | 0        |
| H2    | 0.21935 | 0.21935  | 0.39718  | C2    | -0.3271  | -0.3271  | 0        |
| C5    | 0.2089  | 0.2089   | 0        | C3    | -0.29735 | -0.29735 | -0.2334  |
| C6    | 0.14505 | 0.14505  | 0        | H1    | -0.3169  | -0.3169  | -0.39482 |
| C7    | 0.1694  | 0.0653   | 0        | C4    | -0.2387  | -0.2387  | -0.23537 |
| C8    | 0.2517  | 0.0404   | 0        | H2    | -0.21935 | -0.21935 | -0.39718 |
| H8    | 0.2965  | 0.0736   | 0        | C5    | -0.2089  | -0.2089  | 0        |
| O1    | 0.41519 | -0.41519 | -0.22326 | C6    | -0.14505 | -0.14505 | 0        |
| C1    | 0.39255 | -0.39255 | 0        | C7    | -0.0653  | -0.1694  | 0        |
| C2    | 0.3271  | -0.3271  | 0        | C8    | -0.0404  | -0.2517  | 0        |
| C3    | 0.29735 | -0.29735 | -0.2334  | H8    | -0.0736  | -0.2965  | 0        |
| H1    | 0.3169  | -0.3169  | -0.39482 | O1    | -0.41519 | 0.41519  | -0.22326 |
| C4    | 0.2387  | -0.2387  | -0.23537 | C3    | -0.29735 | 0.29735  | -0.2334  |
| H2    | 0.21935 | -0.21935 | -0.39718 | H1    | -0.3169  | 0.3169   | -0.39482 |



|    |          |          |          |     |          |          |          |
|----|----------|----------|----------|-----|----------|----------|----------|
| C5 | 0.2089   | -0.2089  | 0        | C4  | -0.2387  | 0.2387   | -0.23537 |
| C6 | 0.14505  | -0.14505 | 0        | H2  | -0.21935 | 0.21935  | -0.39718 |
| C7 | 0.1694   | -0.0653  | 0        | O1  | -0.41519 | -0.41519 | 0.22326  |
| C8 | 0.2517   | -0.0404  | 0        | C3  | -0.29735 | -0.29735 | 0.2334   |
| H8 | 0.2965   | -0.0736  | 0        | H1  | -0.3169  | -0.3169  | 0.39482  |
| O1 | 0.41519  | 0.41519  | -0.22326 | C4  | -0.2387  | -0.2387  | 0.23537  |
| N1 | 0        | 0.1205   | 0        | H2  | -0.21935 | -0.21935 | 0.39718  |
| C3 | 0.29735  | 0.29735  | -0.2334  | N1  | -0.1205  | 0        | 0        |
| H1 | 0.3169   | 0.3169   | -0.39482 | C7  | -0.1694  | -0.0653  | 0        |
| C4 | 0.2387   | 0.2387   | -0.23537 | C8  | -0.2517  | -0.0404  | 0        |
| H2 | 0.21935  | 0.21935  | -0.39718 | H8  | -0.2965  | -0.0736  | 0        |
| C7 | 0.0653   | 0.1694   | 0        | C7  | -0.1694  | 0.0653   | 0        |
| C8 | 0.0404   | 0.2517   | 0        | C8  | -0.2517  | 0.0404   | 0        |
| H8 | 0.0736   | 0.2965   | 0        | H8  | -0.2965  | 0.0736   | 0        |
| O1 | 0.41519  | -0.41519 | 0.22326  | Zn2 | 0.5      | 0.5      | -0.2929  |
| C3 | 0.29735  | -0.29735 | 0.2334   | Zn2 | -0.5     | -0.5     | 0.2929   |
| H1 | 0.3169   | -0.3169  | 0.39482  | Zn2 | -0.5     | 0.5      | 0.2929   |
| C4 | 0.2387   | -0.2387  | 0.23537  | Zn2 | 0.5      | -0.5     | 0.2929   |
| H2 | 0.21935  | -0.21935 | 0.39718  | Zn2 | -0.5     | -0.5     | -0.2929  |
| O1 | -0.41519 | 0.41519  | 0.22326  | Zn2 | -0.5     | 0.5      | -0.2929  |
| C1 | -0.39255 | 0.39255  | 0        | Zn2 | 0.5      | -0.5     | -0.2929  |
| C2 | -0.3271  | 0.3271   | 0        | O1  | 0.58481  | 0.41519  | 0.22326  |
| C3 | -0.29735 | 0.29735  | 0.2334   | O1  | 0.58481  | 0.58481  | 0.22326  |
| H1 | -0.3169  | 0.3169   | 0.39482  | O1  | 0.41519  | 0.58481  | 0.22326  |
| C4 | -0.2387  | 0.2387   | 0.23537  | O1  | 0.41519  | 0.58481  | -0.22326 |

|    |          |         |         |    |         |         |          |
|----|----------|---------|---------|----|---------|---------|----------|
| H2 | -0.21935 | 0.21935 | 0.39718 | O1 | 0.58481 | 0.41519 | -0.22326 |
| C5 | -0.2089  | 0.2089  | 0       | O1 | 0.58481 | 0.58481 | -0.22326 |
| C6 | -0.14505 | 0.14505 | 0       |    |         |         |          |

**Table S2.** Recipes for the fabrication of Zn<sub>2</sub>(ZnTCPP) films by VAC.

|                                      | EXP | Precursor solution                                   |                      |                    |                         |        |        | Droplet volume | Substrate        | Temperature | Reaction time | Vapour source |      |             |
|--------------------------------------|-----|------------------------------------------------------|----------------------|--------------------|-------------------------|--------|--------|----------------|------------------|-------------|---------------|---------------|------|-------------|
|                                      |     | Zn(NO <sub>3</sub> ) <sub>2</sub> ·6H <sub>2</sub> O | TCPP                 | pyrazine           | acetic acid (1M in DMF) | DMF    | EtOH   |                |                  |             |               | DMF           | EtOH | Acetic acid |
| Variation of modulator concentration | 1   | 4.5 mg<br>7.5 mmol/L                                 | 4.0 mg<br>2.5 mmol/L | 0.8 mg<br>5 mmol/L | 0 µl<br>0 mmol/L        | 1.5 mL | 0.5 mL | 30 µL          | -COOH SAM gold   | 80 °C       | 3 h           | 1 mL          | 0 mL | 0 µL        |
|                                      | 2   | 4.5 mg<br>7.5 mmol/L                                 | 4.0 mg<br>2.5 mmol/L | 0.8 mg<br>5 mmol/L | 10 µl<br>5 mmol/L       | 1.5 mL | 0.5 mL | 30 µL          | -COOH SAM gold   | 80 °C       | 3 h           | 1 mL          | 0 mL | 5 µL        |
| Variation of substrate type          | 3   | 4.5 mg<br>7.5 mmol/L                                 | 4.0 mg<br>2.5 mmol/L | 0.8 mg<br>5 mmol/L | 10 µl<br>5 mmol/L       | 1.5 mL | 0.5 mL | 30 µL          | Blank gold       | 80 °C       | 3 h           | 1 mL          | 0 mL | 5 µL        |
|                                      | 4   | 4.5 mg<br>7.5 mmol/L                                 | 4.0 mg<br>2.5 mmol/L | 0.8 mg<br>5 mmol/L | 10 µl<br>5 mmol/L       | 1.5 mL | 0.5 mL | 30 µL          | -OH SAM gold     | 80 °C       | 3 h           | 1 mL          | 0 mL | 5 µL        |
|                                      | 5   | 4.5 mg<br>7.5 mmol/L                                 | 4.0 mg<br>2.5 mmol/L | 0.8 mg<br>5 mmol/L | 10 µl<br>5 mmol/L       | 1.5 mL | 0.5 mL | 30 µL          | Silicon wafer    | 80 °C       | 3 h           | 1 mL          | 0 mL | 5 µL        |
|                                      | 6   | 4.5 mg<br>7.5 mmol/L                                 | 4.0 mg<br>2.5 mmol/L | 0.8 mg<br>5 mmol/L | 10 µl<br>5 mmol/L       | 1.5 mL | 0.5 mL | 30 µL          | ITO glass        | 80 °C       | 3 h           | 1 mL          | 0 mL | 5 µL        |
|                                      | 7   | 4.5 mg<br>7.5 mmol/L                                 | 4.0 mg<br>2.5 mmol/L | 0.8 mg<br>5 mmol/L | 10 µl<br>5 mmol/L       | 1.5 mL | 0.5 mL | 30 µL          | -COOH SAM Au QCM | 80 °C       | 3 h           | 1 mL          | 0 mL | 5 µL        |
| variation of droplet volume          | 8   | 4.5 mg<br>7.5 mmol/L                                 | 4.0 mg<br>2.5 mmol/L | 0.8 mg<br>5 mmol/L | 10 µl<br>5 mmol/L       | 1.5 mL | 0.5 mL | 60 µL          | -COOH SAM gold   | 80 °C       | 3 h           | 1 mL          | 0 mL | 5 µL        |

|                      |   |                      |                      |                    |                        |      |        |            |                   |       |     |      |      |           |
|----------------------|---|----------------------|----------------------|--------------------|------------------------|------|--------|------------|-------------------|-------|-----|------|------|-----------|
| variation of solvent | 9 | 4.5 mg<br>7.5 mmol/L | 4.0 mg<br>2.5 mmol/L | 0.8 mg<br>5 mmol/L | 10 $\mu$ L<br>5 mmol/L | 0 mL | 2.0 mL | 30 $\mu$ L | -COOH<br>SAM gold | 80 °C | 3 h | 0 mL | 1 mL | 0 $\mu$ L |
|----------------------|---|----------------------|----------------------|--------------------|------------------------|------|--------|------------|-------------------|-------|-----|------|------|-----------|

**Table S3.** Surface roughness of Zn<sub>2</sub>(ZnTCPP) films fabricated via different methods.

| Methods          | R <sub>a</sub> (nm) | R <sub>q</sub> (nm) |
|------------------|---------------------|---------------------|
| VAC              | 4.5                 | 6.1                 |
| Solvothermal     | 54.1                | 61.2                |
| Modular assembly | 8.1                 | 10.4                |
| LPE              | 2.9                 | 3.1                 |

**Table S4.** Recipes for the fabrication of PCN-222 films by VAC.

|                                      | EXP | Precursor solution                    |                    |                            |      | Droplet volume | Substrate         | Temperature | Reaction time | Vapour source |             |
|--------------------------------------|-----|---------------------------------------|--------------------|----------------------------|------|----------------|-------------------|-------------|---------------|---------------|-------------|
|                                      |     | ZrOCl <sub>2</sub> ·8H <sub>2</sub> O | CuTCPP             | acetic acid                | DMF  |                |                   |             |               | DMF           | Acetic acid |
| Variation of modulator concentration | 9   | 1.9 mg<br>6 mmol/L                    | 1.7 mg<br>2 mmol/L | 0 $\mu$ L<br>0 mmol/L      | 1 mL | 30 $\mu$ L     | -COOH<br>SAM gold | 100 °C      | 3 h           | 1 mL          | 0.2 mL      |
|                                      | 10  | 1.9 mg<br>6 mmol/L                    | 1.7 mg<br>2 mmol/L | 25 $\mu$ L<br>438 mmol/L   | 1 mL | 30 $\mu$ L     | -COOH<br>SAM gold | 100 °C      | 3 h           | 1 mL          | 0.2 mL      |
|                                      | 11  | 1.9 mg<br>6 mmol/L                    | 1.7 mg<br>2 mmol/L | 50 $\mu$ L<br>875 mmol/L   | 1 mL | 30 $\mu$ L     | -COOH<br>SAM gold | 100 °C      | 3 h           | 1 mL          | 0.2 mL      |
|                                      | 12  | 1.9 mg<br>6 mmol/L                    | 1.7 mg<br>2 mmol/L | 75 $\mu$ L<br>1314 mmol/L  | 1 mL | 30 $\mu$ L     | -COOH<br>SAM gold | 100 °C      | 3 h           | 1 mL          | 0.2 mL      |
|                                      | 13  | 1.9 mg<br>6 mmol/L                    | 1.7 mg<br>2 mmol/L | 150 $\mu$ L<br>2625 mmol/L | 1 mL | 30 $\mu$ L     | -COOH<br>SAM gold | 100 °C      | 3 h           | 1 mL          | 0.2 mL      |
|                                      | 14  | 1.9 mg<br>6 mmol/L                    | 1.7 mg<br>2 mmol/L | 300 $\mu$ L<br>5250 mmol/L | 1 mL | 30 $\mu$ L     | -COOH<br>SAM gold | 100 °C      | 3 h           | 1 mL          | 0.2 mL      |

|                                      |    |                     |                    |                            |      |            |                        |        |      |      |        |
|--------------------------------------|----|---------------------|--------------------|----------------------------|------|------------|------------------------|--------|------|------|--------|
| Variation of precursor concentration | 15 | 5.7 mg<br>18 mmol/L | 5.1 mg<br>6 mmol/L | 225 $\mu$ L<br>3942 mmol/L | 1 mL | 30 $\mu$ L | -COOH<br>SAM gold      | 100 °C | 3 h  | 1 mL | 0.2 mL |
| Variation of substrate type          | 16 | 1.9 mg<br>6 mmol/L  | 1.7 mg<br>2 mmol/L | 75 $\mu$ L<br>1314 mmol/L  | 1 mL | 30 $\mu$ L | Silicon wafer          | 100 °C | 3 h  | 1 mL | 0.2 mL |
|                                      | 17 | 1.9 mg<br>6 mmol/L  | 1.7 mg<br>2 mmol/L | 75 $\mu$ L<br>1314 mmol/L  | 1 mL | 30 $\mu$ L | ITO glass              | 100 °C | 3 h  | 1 mL | 0.2 mL |
|                                      | 18 | 1.9 mg<br>6 mmol/L  | 1.7 mg<br>2 mmol/L | 75 $\mu$ L<br>1314 mmol/L  | 1 mL | 30 $\mu$ L | -COOH<br>SAM Au<br>QCM | 100 °C | 3 h  | 1 mL | 0.2 mL |
| variation of droplet volume          | 19 | 1.9 mg<br>6 mmol/L  | 1.7 mg<br>2 mmol/L | 75 $\mu$ L<br>1314 mmol/L  | 1 mL | 60 $\mu$ L | -COOH<br>SAM gold      | 100 °C | 3 h  | 1 mL | 0.2 mL |
| Variation of reaction time           | 20 | 1.9 mg<br>6 mmol/L  | 1.7 mg<br>2 mmol/L | 75 $\mu$ L<br>1314 mmol/L  | 1 mL | 30 $\mu$ L | -COOH<br>SAM gold      | 100 °C | 12 h | 1 mL | 0.2 mL |
| Variation of reaction temperature    | 21 | 1.9 mg<br>6 mmol/L  | 1.7 mg<br>2 mmol/L | 75 $\mu$ L<br>1314 mmol/L  | 1 mL | 30 $\mu$ L | -COOH<br>SAM gold      | 80 °C  | 3 h  | 1 mL | 0.2 mL |
|                                      | 22 | 1.9 mg<br>6 mmol/L  | 1.7 mg<br>2 mmol/L | 75 $\mu$ L<br>1314 mmol/L  | 1 mL | 30 $\mu$ L | -COOH<br>SAM gold      | 120 °C | 3 h  | 1 mL | 0.2 mL |

**Table S5.** Surface roughness of PCN-222 films fabricated via different methods.

| Methods          | R <sub>a</sub> (nm) | R <sub>q</sub> (nm) |
|------------------|---------------------|---------------------|
| VAC              | 2.2                 | 2.7                 |
| Solvothermal     | 3.6                 | 4.6                 |
| Modular assembly | 5.5                 | 6.9                 |
| LPE              | 4.0                 | 4.7                 |

**Table S6.** Recipes for the fabrication of PCN-224 films by VAC.

|                                      | EXP<br>· | Precursor solution                    |                      |                            |      | Droplet<br>volume | Substrate           | Temperature | Reaction<br>time | Vapour source |             |
|--------------------------------------|----------|---------------------------------------|----------------------|----------------------------|------|-------------------|---------------------|-------------|------------------|---------------|-------------|
|                                      |          | ZrOCl <sub>2</sub> ·8H <sub>2</sub> O | CuTCPP               | acetic acid                | DMF  |                   |                     |             |                  | DMF           | Acetic acid |
| Variation of modulator concentration | 23       | 1.9 mg<br>6 mmol/L                    | 1.3 mg<br>1.5 mmol/L | 0 $\mu$ L<br>0 mmol/L      | 1 mL | 30 $\mu$ L        | -COOH SAM<br>gold   | 70 °C       | 3 h              | 1 mL          | 0.2 mL      |
|                                      | 24       | 1.9 mg<br>6 mmol/L                    | 1.3 mg<br>1.5 mmol/L | 150 $\mu$ L<br>2625 mmol/L | 1 mL | 30 $\mu$ L        | -COOH SAM<br>gold   | 70 °C       | 3 h              | 1 mL          | 0.2 mL      |
|                                      | 25       | 1.9 mg<br>6 mmol/L                    | 1.3 mg<br>1.5 mmol/L | 300 $\mu$ L<br>5250 mmol/L | 1 mL | 30 $\mu$ L        | -COOH SAM<br>gold   | 70 °C       | 3 h              | 1 mL          | 0.2 mL      |
|                                      | 26       | 1.9 mg<br>6 mmol/L                    | 1.3 mg<br>1.5 mmol/L | 500 $\mu$ L<br>8720 mmol/L | 1 mL | 30 $\mu$ L        | -COOH SAM<br>gold   | 70 °C       | 3 h              | 1 mL          | 0.2 mL      |
| Variation of substrate type          | 27       | 1.9 mg<br>6 mmol/L                    | 1.3 mg<br>1.5 mmol/L | 500 $\mu$ L<br>8720 mmol/L | 1 mL | 30 $\mu$ L        | Silicon wafer       | 70 °C       | 3 h              | 1 mL          | 0.2 mL      |
|                                      | 28       | 1.9 mg<br>6 mmol/L                    | 1.3 mg<br>1.5 mmol/L | 500 $\mu$ L<br>8720 mmol/L | 1 mL | 30 $\mu$ L        | -COOH SAM<br>Au QCM | 70 °C       | 3 h              | 1 mL          | 0.2 mL      |
| Variation of reaction time           | 29       | 1.9 mg<br>6 mmol/L                    | 1.3 mg<br>1.5 mmol/L | 500 $\mu$ L<br>8720 mmol/L | 1 mL | 30 $\mu$ L        | -COOH SAM<br>gold   | 70 °C       | 12 h             | 1 mL          | 0.2 mL      |
| Variation of reaction temperature    | 30       | 1.9 mg<br>6 mmol/L                    | 1.3 mg<br>1.5 mmol/L | 500 $\mu$ L<br>8720 mmol/L | 1 mL | 30 $\mu$ L        | -COOH SAM<br>gold   | 100 °C      | 3 h              | 1 mL          | 0.2 mL      |
|                                      | 31       | 1.9 mg<br>6 mmol/L                    | 1.3 mg<br>1.5 mmol/L | 500 $\mu$ L<br>8720 mmol/L | 1 mL | 30 $\mu$ L        | -COOH SAM<br>gold   | 120 °C      | 3 h              | 1 mL          | 0.2 mL      |

**Table S7.** Recipes for the fabrication of MOF-525 films by VAC.

|  | EXP<br>· | Precursor solution                    |        |             |     | Droplet<br>volume | Substrate | Temperature | Reaction<br>time | Vapour source |             |
|--|----------|---------------------------------------|--------|-------------|-----|-------------------|-----------|-------------|------------------|---------------|-------------|
|  |          | ZrOCl <sub>2</sub> ·8H <sub>2</sub> O | CuTCPP | acetic acid | DMF |                   |           |             |                  | DMF           | Acetic acid |

|                                      |    |                    |                    |                            |      |            |                     |       |      |      |        |
|--------------------------------------|----|--------------------|--------------------|----------------------------|------|------------|---------------------|-------|------|------|--------|
| Variation of modulator concentration | 32 | 1.9 mg<br>6 mmol/L | 2.6 mg<br>3 mmol/L | 12.5 $\mu$ L<br>219 mmol/L | 1 mL | 30 $\mu$ L | -COOH SAM<br>gold   | 80 °C | 3 h  | 1 mL | 0.2 mL |
|                                      | 33 | 1.9 mg<br>6 mmol/L | 2.6 mg<br>3 mmol/L | 25 $\mu$ L<br>438 mmol/L   | 1 mL | 30 $\mu$ L | -COOH SAM<br>gold   | 80 °C | 3 h  | 1 mL | 0.2 mL |
|                                      | 34 | 1.9 mg<br>6 mmol/L | 2.6 mg<br>3 mmol/L | 75 $\mu$ L<br>1313 mmol/L  | 1 mL | 30 $\mu$ L | -COOH SAM<br>gold   | 80 °C | 3 h  | 1 mL | 0.2 mL |
|                                      | 35 | 1.9 mg<br>6 mmol/L | 2.6 mg<br>3 mmol/L | 125 $\mu$ L<br>2188 mmol/L | 1 mL | 30 $\mu$ L | -COOH SAM<br>gold   | 80 °C | 3 h  | 1 mL | 0.2 mL |
|                                      | 36 | 1.9 mg<br>6 mmol/L | 2.6 mg<br>3 mmol/L | 200 $\mu$ L<br>3500 mmol/L | 1 mL | 30 $\mu$ L | -COOH SAM<br>gold   | 80 °C | 3 h  | 1 mL | 0.2 mL |
|                                      | 37 | 1.9 mg<br>6 mmol/L | 2.6 mg<br>3 mmol/L | 250 $\mu$ L<br>4375 mmol/L | 1 mL | 30 $\mu$ L | -COOH SAM<br>gold   | 80 °C | 3 h  | 1 mL | 0.2 mL |
| Variation of substrate type          | 38 | 1.9 mg<br>6 mmol/L | 2.6 mg<br>3 mmol/L | 250 $\mu$ L<br>4375 mmol/L | 1 mL | 30 $\mu$ L | Silicon wafer       | 80 °C | 3 h  | 1 mL | 0.2 mL |
|                                      | 39 | 1.9 mg<br>6 mmol/L | 2.6 mg<br>3 mmol/L | 250 $\mu$ L<br>4375 mmol/L | 1 mL | 30 $\mu$ L | ITO glass           | 80 °C | 3 h  | 1 mL | 0.2 mL |
|                                      | 40 | 1.9 mg<br>6 mmol/L | 2.6 mg<br>3 mmol/L | 250 $\mu$ L<br>4375 mmol/L | 1 mL | 30 $\mu$ L | -COOH SAM<br>Au QCM | 80 °C | 3 h  | 1 mL | 0.2 mL |
| Variation of reaction time           | 41 | 1.9 mg<br>6 mmol/L | 2.6 mg<br>3 mmol/L | 250 $\mu$ L<br>4375 mmol/L | 1 mL | 30 $\mu$ L | -COOH SAM<br>gold   | 80 °C | 12 h | 1 mL | 0.2 mL |

**Table S8.** Surface roughness of PCN-224 and MOF-525 films fabricated by VAC.

| MOFs    | R <sub>a</sub> (nm) | R <sub>q</sub> (nm) |
|---------|---------------------|---------------------|
| PCN-224 | 13.1                | 16.5                |
| MOF-525 | 8.5                 | 10.3                |

## Reference

1. D. Feng, Z. Y. Gu, J. R. Li, H. L. Jiang, Z. Wei and H. C. Zhou, *Angew. Chem., Int. Ed.*, 2012, **51**, 10307.
